# Supplementary material for: Modular function of long noncoding RNA, COLDAIR, in the vernalization response
Source: PubMed Central journal article supplement (PMC5552341; doi:10.1371/journal.pgen.1006939), 2017-07-31
Supplement: pgen.1006939.s001.pdf [file pgen.1006939.s001.pdf]

**Supplementary Table S1.** Sequences of probes used in ChIRP analysis.

| <b>Name</b> | <b>5'-3' sequence</b> | <b>Target</b>        |
|-------------|-----------------------|----------------------|
| CA1         | caattttaacgaataggaac  | COLDAIR tilling      |
| CA2         | tgacctagaagatccaacaa  | COLDAIR tilling      |
| CA3         | tcacaacaaaagattgaggt  | COLDAIR tilling      |
| CA4         | gcgactaagacagataaaaa  | COLDAIR tilling      |
| CA5         | gaatgacaatttccatgaca  | COLDAIR tilling      |
| CA6         | aatatatcttccatagaagg  | COLDAIR tilling      |
| CA7         | tgggattttcaatttcctag  | COLDAIR tilling      |
| CA8         | agtaggaaacttatcacaca  | COLDAIR tilling      |
| CA9         | gatccgtaccaaagagggtg  | COLDAIR tilling      |
| CA10        | agttttctgccctgaagtt   | COLDAIR tilling      |
| CA11        | gggtttagtagacactaca   | COLDAIR tilling      |
| CA12        | actgtgagggtccaattcc   | COLDAIR tilling      |
| CA13        | atgcatcaagtgagaatcgg  | COLDAIR tilling      |
| CA14        | ccggtcttccattttgtat   | COLDAIR tilling      |
| CA15        | tctagtcagggtctcgaca   | COLDAIR tilling      |
| CA16        | atggaccgagtccttagacaa | COLDAIR tilling      |
| CA17        | cgttctaaaaggcttctct   | COLDAIR tilling      |
| CA18        | gcggttaaccagataaccata | COLDAIR tilling      |
| CA19        | aacctaagtatgcaaaaaga  | COLDAIR tilling      |
| CA20        | tttttccagcgatagagct   | COLDAIR tilling      |
| CA21        | tgtaatatagatcagtcct   | COLDAIR tilling      |
| CA22        | acgagaaaacttttcggatt  | COLDAIR tilling      |
| LY1         | ccgaacatcaaaaagttgt   | control LacY tilling |
| LY2         | gaaaaacgggaagtaggctc  | control LacY tilling |
| LY3         | acagcgggttgaataatagc  | control LacY tilling |
| LY4         | cacagcaggattttgcgag   | control LacY tilling |
| LY5         | aaataaagaacggcgcaaac  | control LacY tilling |
| LY6         | cgatcctactaaaatgtgt   | control LacY tilling |
| LY7         | ggcgttaaaaacaaaagccta | control LacY tilling |
| LY8         | cgcgcgaccaaattcgaaat  | control LacY tilling |
| LY9         | tgaacatgatgccgacaatc  | control LacY tilling |
| LY10        | catccgttttggcgaaaag   | control LacY tilling |
| LY11        | ctaaatgccgaatggtggc   | control LacY tilling |
| LY12        | gccaataacatacagtgaca  | control LacY tilling |
| LY13        | aaattagcaactgttggtc   | control LacY tilling |
| LY14        | gtaattcgcccattgtcgtt  | control LacY tilling |
| LY15        | cagcagggcgttttccac    | control LacY tilling |

|      |                      |                      |
|------|----------------------|----------------------|
| LY16 | aacgatgagccaataatacg | control LacY tilling |
| LY17 | cagcaggaacggtacttcaa | control LacY tilling |
| LY18 | aaaaacgcacttcaaactgg | control LacY tilling |
| LY19 | atgccagttgcttaaagaa  | control LacY tilling |
| LY20 | cagacccagcaccagataag | control LacY tilling |
| LY21 | gggccgctaagcgtgaacac | control LacY tilling |
| LY22 | gacttcattcacctgacgac | control LacY tilling |
